# Supplementary material for: Single-Step Genome Editing of Small Ruminant Embryos by Electroporation
Source: MDPI journal article supplement (doi:10.3390/ijms231810218), 2022-09-06
Supplement: s1 [file s1]

## Supplementary Materials

**Table S1.** sgRNA sequences.

| No | Target | Species      | sgRNA Sequence              |
|----|--------|--------------|-----------------------------|
| 1  | SOCS2  | Ovis aries   | sgRNA1 GGAGGACUCGAGGCACCGC  |
|    |        |              | sgRNA2 UCGCCAGACGCGCCGCCUCU |
| 2  | PDX1   | Ovis aries   | sgRNA1 UCAUGCGUGGAAAGGCCAGU |
|    |        |              | sgRNA2 UCGUAUGGGGAGAUGUCCGG |
| 3  | OTX2   | Capra hircus | sgRNA1 AACCGCCUUAUGCAGUCAAU |
|    |        |              | sgRNA2 AGACAUCUUAUGCGGGAGG  |

**Table S2.** Primers sequences.

| No | Target | Species      | Primers sequence                    | Amplicon Size<br>bp |
|----|--------|--------------|-------------------------------------|---------------------|
| 1  | SOCS2  | Ovis aries   | Forward AGGGAGTGGTTTTGGGGTTC        | 479                 |
|    |        |              | Reverse AGCGCCCTAAGAGTCGATTT        |                     |
| 2  | PDX1   | Ovis aries   | Forward AGGAAGAGCGCTGAG-<br>TAGAAAG | 652                 |
|    |        |              | Reverse CATGAACCGCGAGGAGCAGTA       |                     |
| 3  | OTX2   | Capra hircus | Forward GTGGAACGTGAAAGAGCTGC        | 1519                |
|    |        |              | Reverse TCCTTTGCTCGTTTCCTGGAG       |                     |

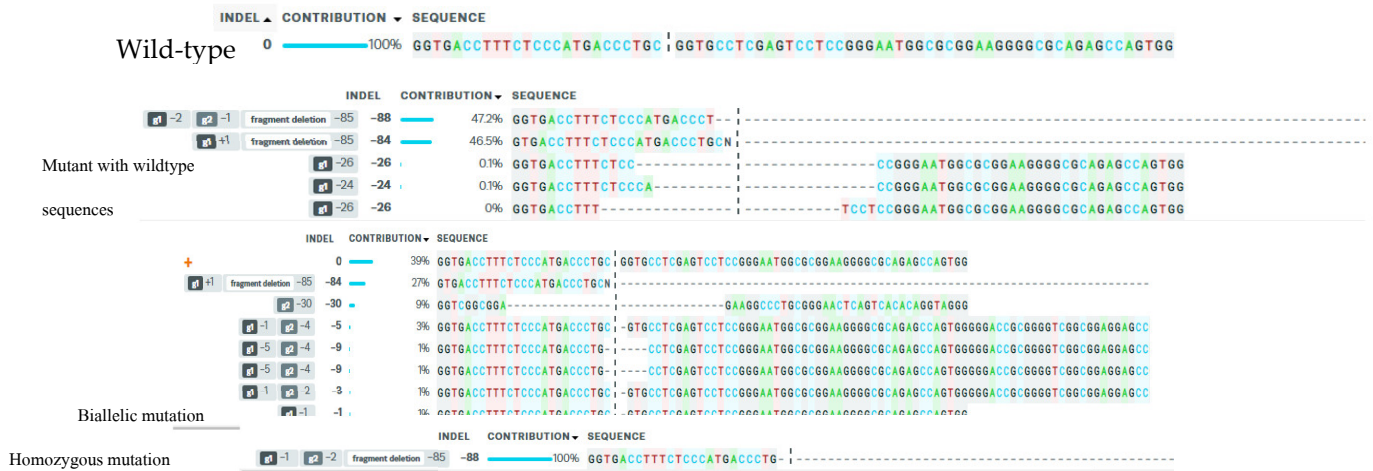

**Supplementary Figure S1.** The Inference of CRISPR Editing (ICE) analysis of some samples.
